# Oral contraceptives and colorectal cancer risk: a systematic review and meta-analysis

Cristina Bosetti<sup>1,3</sup>, Francesca Bravi<sup>1,2</sup>, Eva Negri<sup>1</sup>,  
and Carlo La Vecchia<sup>1,2</sup>

<sup>1</sup>Department of Epidemiology, Istituto di Ricerche Farmacologiche “Mario Negri”, Via Giuseppe La Masa 19 20156, Milan, Italy <sup>2</sup>Istituto di Statistica Medica e Biometria “G.A. Maccacaro”, Università degli Studi di Milano, Via Venezian 1 20133, Milan, Italy

<sup>3</sup>Correspondence address. Tel: +39-0239014526; Fax: +39-0233200231; E-mail: bosetti@marionegri.it

## TABLE OF CONTENTS

- Introduction
- Methods
- Results
- Discussion

**BACKGROUND:** Various studies have reported an inverse relation between oral contraceptive (OC) use and the risk of colorectal cancer, but the issue is still open.

**METHODS:** In order to quantify the association between OC use and colorectal cancer risk, we performed a systematic review and meta-analysis of studies on this issue. We identified all relevant studies published, in English, as original articles up to December 2008 through a search of the literature using PubMed and EMBASE, and by reviewing the references from the retrieved articles.

**RESULTS:** The summary relative risk of colorectal cancer for ever versus never OC use was 0.82 (95% confidence interval, CI, 0.69–0.97) from 11 case–control studies, 0.81 (95% CI, 0.75–0.89) from seven cohort studies, and 0.81 (95% CI, 0.72–0.92) from all studies combined. The results were similar for colon and rectal cancer. No difference was evident according to duration of OC use both for colon and rectal cancer, although there is an indication that the protection is stronger for more recent use (OR = 0.70, 95% CI, 0.53–0.90, on the basis of four studies).

**CONCLUSION:** Epidemiological data consistently indicate that OC users have a reduced risk of colorectal cancer, and that the protection is greater for recent use in the absence, however, of a duration–risk relation.

**Key words:** colorectal cancer / epidemiology / meta-analysis / oral contraceptives / risk

## Introduction

A role of reproductive factors on colorectal carcinogenesis has long been suggested, starting from the observation of an excess colorectal cancer in nuns (Fraumeni *et al.*, 1969), and of an inverse relation between parity and colorectal cancer in several studies (La Vecchia and Franceschi, 1991). Epidemiological, metabolic and animal data also indicated that endogenous and exogenous hormones could affect colorectal cancer risk (McMichael and Potter, 1980). With reference to oral contraceptives (OCs), in a meta-analysis of

epidemiological studies published up to June 2000, the pooled relative risk (RR) of colorectal cancer for ever OC use was 0.81 from eight case–control studies, 0.84 from four cohort studies and 0.82 (95% confidence interval, CI, 0.74–0.92) from all studies combined (Fernandez *et al.*, 2001). However, no relation with duration of use was observed. The pattern of risk was similar for colon and rectal cancer.

Among more recent investigations, a Swiss case–control study on 131 women with colorectal cancer and 373 hospital controls reported an odds ratio (OR) of 0.8 for ever OC use (Levi *et al.*, 2003), in the absence of consistent relation with duration and time since first or last

OC use. In a case–control study from Wisconsin, USA, including 1122 cases of colon cancer, 366 of rectal cancer and 4297 population controls, the overall OR for ever use was 0.89, with no difference between colon (OR = 0.87) and rectal (OR = 0.87) cancer (Nichols et al., 2005). No pattern in risk was seen according to duration of use, although the risk reduction was stronger for more recent use for rectal, but not colon, cancer. A case–control study from Canada on 1404 colorectal cancer cases and 1203 population controls found a significant reduced risk for ever use of OC (OR = 0.77), with no evidence, however, of a relation with duration of use (Campbell et al., 2007). The Oxford Family Planning Association cohort study including 17 032 women and 46 cases of colorectal cancer reported no association with OC use (Vessey et al., 2003). In a cohort study of 267 400 female textile workers in Shanghai, China, including 655 women with colon cancer, the RR was 1.09 for women who had ever used OC, in the absence of any trend in risk with duration of OC use (Rosenblatt et al., 2004). In the 2003 follow-up of the Royal College of General Practitioners' OC Study (46 000 women, ~35 years follow-up) there were 323 cases of colorectal cancer, corresponding to a RR of 0.72 for ever OC users (Hannafor and Elliott, 2005). In a nested case–control study within that cohort there were 146 cases of colorectal cancer (Hannafor et al., 2007). The OR was 0.84 for ever users, with greater reduction in risk for current (OR = 0.38) than for former (OR = 0.89) users. In the 11-year follow-up of the Women's Health Study, including 39 680 women and 267 cases of colorectal cancer, the RR for ever OC use was 0.67, with little evidence, however, of a duration–risk relation (Lin et al., 2007). In a cohort study of Canadian women within a breast cancer screening program, including 89 835 women followed for an average of 16.4 years, there were 1142 incident colorectal cancers (Kabata et al., 2008). The overall RR for ever OC use was 0.83, with no difference across colorectal subsites. There was no relation with duration of OC use.

The issue, however, is still open, and the IARC Monograph on combined estrogen–progestogen contraceptives concluded that there was evidence for a lack of carcinogenicity of OC on colorectal cancer (IARC, 2007).

In order to provide a quantification of the association between OC use and colorectal cancer risk, we performed a comprehensive review and meta-analysis including all data published up to December 2008.

## Methods

### Search strategy and selection criteria

In the present meta-analysis, we included all case–control and cohort studies published as original articles in English up to December 2008. They were identified through a search of the literature using PubMed and EMBASE with the keywords: ['oral contraceptives' OR 'exogenous hormones'] AND ['colorectal' OR 'colon' OR 'rectal' OR 'rectum'] AND ['cancer' OR 'neoplasm'] AND ['case–control study' OR 'cohort study']. We retrieved and assessed potentially relevant articles, and checked the reference lists of all papers of interest to identify additional relevant publications. Studies were considered only if they provided information on OC separately from hormone replacement therapy or other hormonal therapies. We did not assign quality scores to studies, and no study was excluded *a priori* for weakness of design or data quality. However, we performed sensitivity analyses, excluding studies which

provided crude estimates or estimates adjusted for age and a few selected covariates only. Articles were reviewed and data were extracted and cross-checked independently by 2 investigators, and any disagreement was resolved by consensus among the 2. When multiple reports were published on the same population or subpopulation, we included in the meta-analysis only the most recent or informative one.

For each study, we abstracted information on study design, country, number of subjects (cases, controls or cohort size), length of follow-up (for cohort studies), prevalence of OC use, confounders allowed for in the analysis, RR estimates for ever OC use, and (when available) for duration and recency of use, and corresponding 95% CIs. The primary analysis concerned the risk for ever versus never OC users; whenever possible, we also abstracted information on duration and recency of OC use. In most studies, the primary outcome was colorectal cancer, but some included colon cancer only, and others provided colon and rectal cancer separately. These were also considered, whenever possible.

### Statistical methods

The measure of interest was the RR (or the OR in case–control studies), giving preference to RR estimates adjusted for multiple confounding factors. When RRs were not available in published papers, we computed unadjusted RRs from the exposure distributions as given in the papers. We derived summary estimates of the RR using fixed effect models (i.e. as weighed averages using the inverse of the variance of the log (RR) as weight), and we assessed the heterogeneity between studies using the  $\chi^2$  test (Greenland, 1987). When significant heterogeneity (defined as a *P*-value for heterogeneity <0.10) was found, we used a random effect model (i.e. as weighed averages using the sum of the inverse of the variance of the log (RR) and the moment estimator of the variance between studies as weight) (DerSimonian and Laird, 1986). We also calculated summary estimates for case–control and cohort studies separately. Since duration and recency of use were not uniformly reported, we first defined for each study two categories of duration (short-term, approximately <5 years; long-term use, approximately  $\geq$ 5 years) and of recency (shorter time since last use, approximately <10 years; longer time since last use, approximately  $\geq$ 10 years); then we pooled the risk estimates for these categories. We also computed pooled RR estimates for <5 and  $\geq$ 5 years of duration of OC use of use, and for <10 and  $\geq$ 10 years since last OC use. Inadequate information was available on the type of OC used.

We provided forest plots, in which a square was plotted for each study, whose center projection on the underlying scale corresponds to the study-specific RR. The area of the square is proportional to the inverse of the variance of the natural logarithm of the RR, and gives thus a measure of the amount of statistical information available from that particular estimate. A diamond was used to plot the summary RRs, whose center represents the RR and its extremes show the 95% CIs.

Publication bias was evaluated using funnel plots and quantified by the Egger's test (Egger et al., 1997; Thornton and Lee, 2000).

## Results

From the initial literature search we identified and checked 57 abstracts; 18 articles were considered of interest and full-text were retrieved for detailed evaluation; references of these articles were reviewed and 11 additional relevant studies were identified; six of these articles were subsequently excluded from the meta-analysis (since they were based on the same study population), thus leaving

**Table 1** Case-control on OCs and colorectal cancer

| Reference                                   | Country, study acronym  | No. of cases |       |        | No. of controls | Source of information                       | Confounders                                                                                                                                                                 |
|---------------------------------------------|-------------------------|--------------|-------|--------|-----------------|---------------------------------------------|-----------------------------------------------------------------------------------------------------------------------------------------------------------------------------|
|                                             |                         | Colorectum   | Colon | Rectum |                 |                                             |                                                                                                                                                                             |
| Weiss <i>et al.</i> (1981)                  | Washington State, USA   | 143          | —     | —      | 707             | Interview                                   | Age                                                                                                                                                                         |
| Potter and McMichael (1983)                 | Adelaide, Australia     | 155          | 99    | 56     | 311             | Interview                                   | Age <sup>b</sup>                                                                                                                                                            |
| Furner <i>et al.</i> (1989)                 | Chicago, USA            | 90           | —     | —      | 208             | Medical records + interview + self-reported | —                                                                                                                                                                           |
| Kune <i>et al.</i> (1990)                   | Melbourne, Australia    | 190          | 108   | 82     | 200             | Interview                                   | Age, parity, age at first birth                                                                                                                                             |
| Peters <i>et al.</i> (1990)                 | Los Angeles, USA        | —            | 327   | —      | 327             | Interview                                   | Age <sup>b</sup> , physical exercise, alcohol, fat, calcium, family history of cancer, parity                                                                               |
| Wu-Williams <i>et al.</i> (1991)            | North America and China | 395          | 192   | 203    | 1112            | Interview                                   | —                                                                                                                                                                           |
| Jacobs <i>et al.</i> (1994)                 | Seattle, USA            | —            | 193   | —      | 194             | Interview                                   | Age, vitamin intake                                                                                                                                                         |
| Kampman <i>et al.</i> (1994)                | The Netherlands         | —            | 102   | —      | 123             | Interview                                   | Age <sup>b</sup> , region <sup>b</sup> , socioeconomic level, urbanization <sup>b</sup> , energy intake, selected dietary habits, cholecistectomy, family history of cancer |
| Kampman <i>et al.</i> (1997)                | USA, KPMC               | —            | 894   | —      | 1120            | Interview                                   | Age <sup>b</sup> , physical exercise, body mass index, energy intake, aspirin, family history of cancer, hormone replacement therapy                                        |
| Fernandez <i>et al.</i> (1996)              | Italy                   | 709          | —     | —      | 992             | Interview                                   | Age, residence, social class, family history of cancer, age at menarche, parity                                                                                             |
| Talamini <i>et al.</i> (1998)               | Italy                   | 507          | —     | —      | 2081            | Interview                                   | Age, centre, education, physical activity, energy intake                                                                                                                    |
| Fernandez <i>et al.</i> (1998) <sup>a</sup> | Italy                   | —            | 803   | 429    | 2793            | Interview                                   | Age, education, centre, body mass index, energy intake, family history of cancer, parity, age at menopause, hormone replacement therapy                                     |
| Levi <i>et al.</i> (2003)                   | Switzerland             | 131          | —     | —      | 373             | Interview                                   | Age, education, physical activity, fiber, family history of cancer, parity                                                                                                  |
| Nichols <i>et al.</i> (2005)                | Wisconsin, USA          | 1488         | 1112  | 366    | 4297            | Interview                                   | Age, study, education, body mass index, smoking, alcohol, screening, family history of cancer, hormone replacement therapy, age at first birth                              |
| Campbell <i>et al.</i> (2007)               | Canada                  | 1404         | —     | —      | 1203            | Self-reported                               | Age, residence, education, physical activity, body mass index, colorectal screening, post-menopausal hormones, menopausal status                                            |

KPMC: Kaiser Permanente Medical Care.

<sup>a</sup>Pooled data from Fernandez *et al.* (1996) and Talamini *et al.* (1998).<sup>b</sup>Matching variables.

**Table II Cohort studies on OCs and colorectal cancer**

| Reference                                 | Country, study acronym | No. of cancers/deaths |       |        | Cohort size | Follow-up | Source of information | Confounders                                                                                                                                                                                                         |
|-------------------------------------------|------------------------|-----------------------|-------|--------|-------------|-----------|-----------------------|---------------------------------------------------------------------------------------------------------------------------------------------------------------------------------------------------------------------|
|                                           |                        | Colorectum            | Colon | Rectum |             |           |                       |                                                                                                                                                                                                                     |
| Martinez <i>et al.</i> (1997)             | USA, NHS               | 501                   | 396   | 105    | 89 448      | 12 years  | Self-reported         | Age, body mass index, physical exercise, smoking, alcohol, meat, aspirin, family history of cancer, menstrual factors                                                                                               |
| Bostick <i>et al.</i> (1994)              | Iowa, USA, WHS         | —                     | 212   | —      | 35 215      | 4 years   | Self-reported         | Age, height, energy intake, vitamin, parity                                                                                                                                                                         |
| Troisi <i>et al.</i> (1997)               | USA, BCDDP             | 330                   | —     | —      | 57 529      | 10 years  | Interview             | Age                                                                                                                                                                                                                 |
| Van Wayenburg <i>et al.</i> (2000)        | Netherlands            | 95 <sup>a</sup>       | —     | —      | 10 671      | 18 years  | Self-reported         | Age, socioeconomic status, body mass index, smoking, age at first birth, type of menopause                                                                                                                          |
| Vessey <i>et al.</i> (2003)               | UK, OPFA               | 46 <sup>a</sup>       | —     | —      | 17 032      | 30 years  | Interview             | Age, social class, smoking, parity                                                                                                                                                                                  |
| Rosenblatt <i>et al.</i> (2004)           | China                  | —                     | 655   | —      | 267 400     | 10 years  | Interview             | Age, parity                                                                                                                                                                                                         |
| Hannaforde and Elliot (2005) <sup>b</sup> | UK, RCGP OC            | 146                   | —     | —      | 46 000      | 35 years  | Medical records       | Age, social class, smoking, parity, hormone replacement therapy                                                                                                                                                     |
| Hannaforde <i>et al.</i> (2007)           | UK, RCGP OC            | 323                   | —     | —      | 46 000      | 35 years  | Medical records       | Age, social class, smoking, parity, hormone replacement therapy                                                                                                                                                     |
| Lin <i>et al.</i> (2007)                  | USA, WHI               | 267                   | 205   | 55     | 39 680      | 11 years  | Self-reported         | Age, body mass index, physical activity, smoking, alcohol, meat, vitamin supplementation, family history of cancer, history of benign colorectal polyps, aspirin, treatment assignment, hormone replacement therapy |
| Kabat <i>et al.</i> (2008)                | Canada, CNBSS          | 1142                  | 790   | 366    | 89 835      | 16 years  | Self-reported         | Age, education, body mass index, smoking, menopausal status, hormone replacement therapy                                                                                                                            |

BCDDP: Breast Cancer Detection Demonstration Project; CNBSS: Canadian National Breast Screening Study; NHS: Nurses' Health Study; OPFA: Oxford Family Planning Association; OC: Oral contraceptives; RCGP: Royal College of General Practitioners; WHI: Women's Health Initiative; WHS: Women Health Study.

<sup>a</sup>Deaths.

<sup>b</sup>Nested case-control study within the RCGP OC cohort.

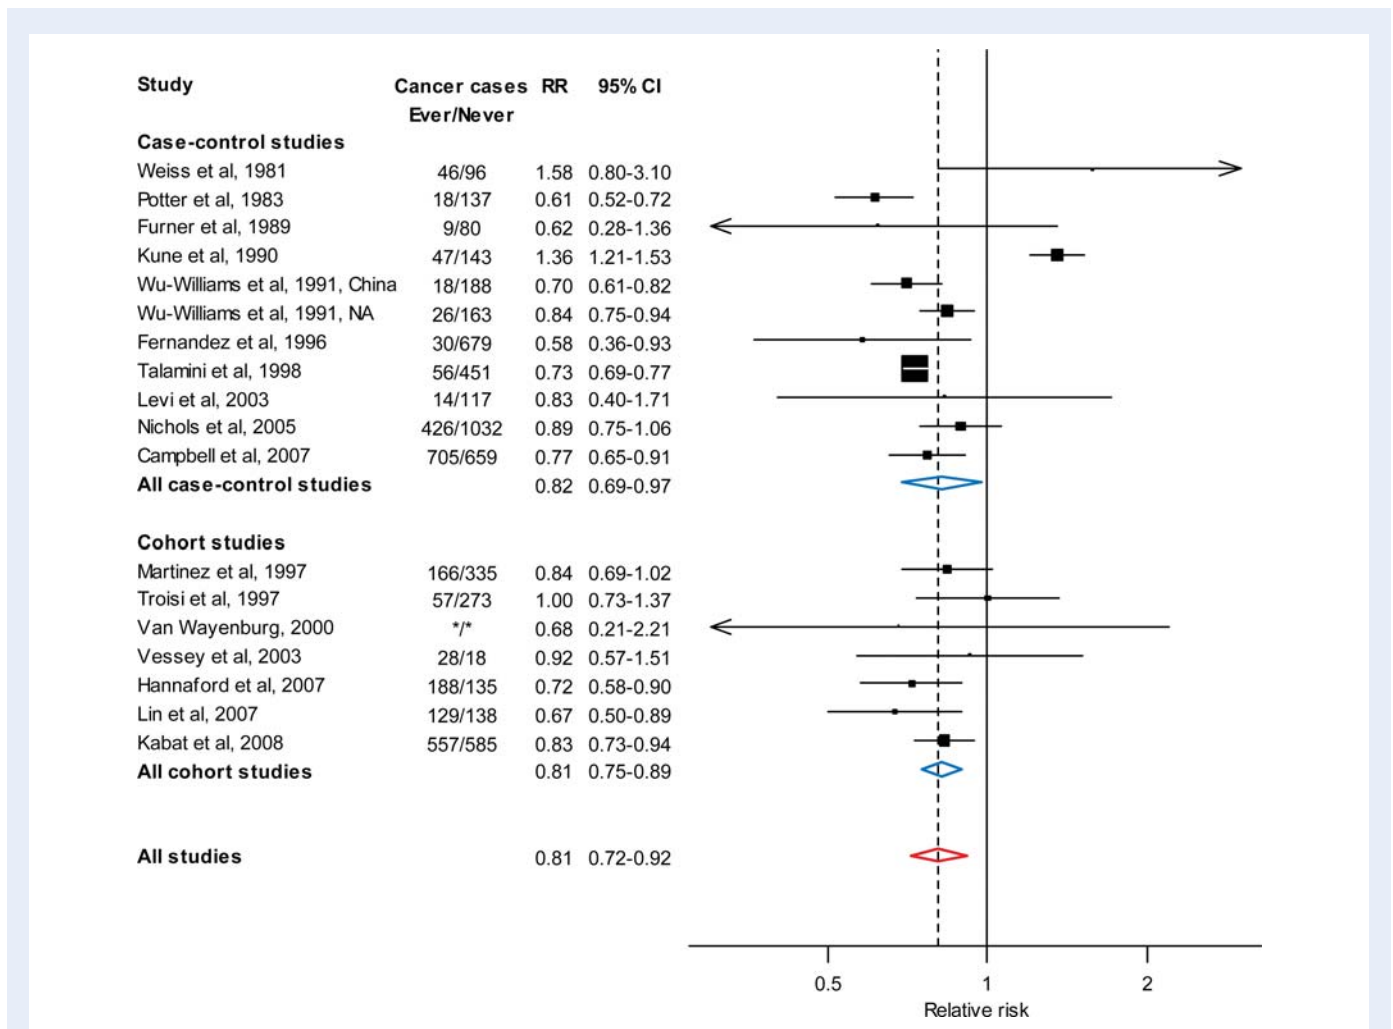

**Figure 1** Summary RRs of colorectal cancer for ever versus never use of OCs from case-control and cohort studies.\*Data not given. CI: confidence interval. NA: North America.

23 independent studies, 14 case-control and nine cohort studies (Appendix 1).

The main characteristic of the 14 case-control studies (Weiss *et al.*, 1981; Furner *et al.*, 1989; Kune *et al.*, 1990; Peters *et al.*, 1990; Franceschi *et al.*, 1991; Wu-Williams *et al.*, 1991; Jacobs *et al.*, 1994; Kampman *et al.*, 1994; Fernandez *et al.*, 1996, 1998; Kampman *et al.*, 1997; Talamini *et al.*, 1998; Levi *et al.*, 2003; Nichols *et al.*, 2005; Campbell *et al.*, 2007) included in the meta-analysis are given in Table I. Corresponding information for the nine cohort investigations (Bostick *et al.*, 1994; Martinez *et al.*, 1997; Troisi *et al.*, 1997; van Wayenburg *et al.*, 2000; Vessey *et al.*, 2003; Rosenblatt *et al.*, 2004; Hannaforde and Elliott, 2005; Hannaforde *et al.*, 2007; Lin *et al.*, 2007; Kabat *et al.*, 2008) are given in Table II. The Tables include the study reference, country and acronym; the number of cases/deaths by colorectal subsites; the number of controls (or cohort size and years of follow-up for cohort studies); the source of information (interview-administered questionnaire; self-reported; medical records); and the variables allowed for in the analyses information.

Figure 1 shows the RRs of colorectal cancer for ever OC users as compared with never users in case-control and cohort studies, and

overall. The summary RR from 11 case-control studies was 0.82 (95% CI, 0.69–0.97), with significant heterogeneity across studies ( $\chi^2 = 111.6$ , 10 df;  $P < 0.001$ ). This heterogeneity was largely explained by two earlier studies (Weiss *et al.*, 1981; Kune *et al.*, 1990), one of which included in the reference category OC users for <1 year (Weiss *et al.*, 1981). The summary RR from seven cohort studies was 0.81 (95% CI, 0.75–0.89), in the absence again of significant heterogeneity. Overall, the RR from all studies combined was 0.81 (95% CI, 0.72–0.92), with significant heterogeneity between studies ( $\chi^2 = 116.9$ , 17 df;  $P < 0.001$ ).

Considering colon cancer, the summary RR was 0.85 (95% CI, 0.75–0.96) from 10 case-control studies, 0.86 (95% CI, 0.77–0.95) from five cohort studies, and 0.85 (95% CI, 0.79–0.93) from all studies (Fig. 2). No significant heterogeneity across studies was observed.

For rectal cancer, the summary RR was 0.80 (95% CI, 0.57–1.13) from six case-control studies, 0.80 (95% CI, 0.66–0.96) from three cohort studies and 0.80 (95% CI, 0.70–0.92) from all studies, again in the absence of significant heterogeneity (Fig. 3).

The RR for colorectal cancer was 0.82 (95% CI 0.70–0.96) after excluding studies which provided only crude estimates (Furner *et al.*,

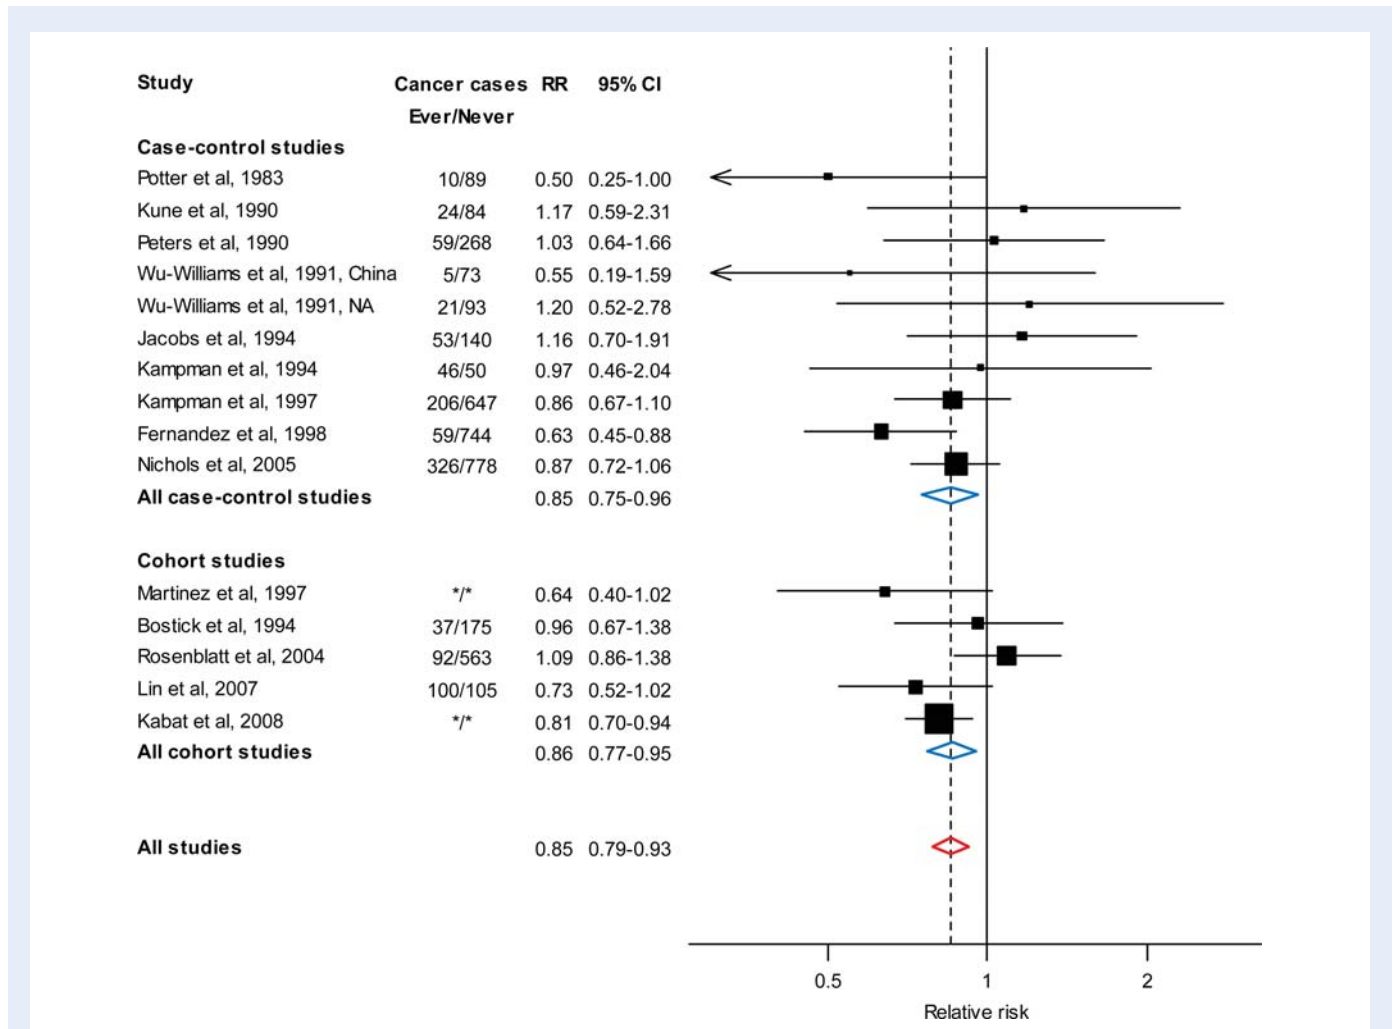

**Figure 2** Summary RRs of colon cancer for ever versus never use of OCs from case-control and cohort studies.

\*Data not given. CI: confidence interval. NA: North America.

1989; Wu-Williams *et al.*, 1991) or which adjusted for age and a few selected covariates only (Weiss *et al.*, 1981; Potter and McMichael, 1983; Jacobs *et al.*, 1994; Troisi *et al.*, 1997). Corresponding figures, were 0.82 (95% CI, 0.75–0.89) for colon and 0.82 (95% CI, 0.66–1.03) for rectal cancer (data not shown).

Table III shows the summary RR according to duration and recency of OC use. Twelve studies provided information on duration of use and colorectal cancer; their pooled RR was 0.88 (95% CI, 0.77–1.01) for short-term use, and 0.86 (95% CI, 0.74–1.00) for long-term use. No difference was evident according to duration of OC use for cancer of the colon (RR = 0.90 for short-term and 0.87 for long-term use, based on 10 studies) and of the rectum (RR = 0.94 for short-term and 0.99 for long-term use, based on six studies) (Table III). Corresponding RRs for duration of use <5 years or ≥5 years were 0.84 (95% CI, 0.75–0.94) and 0.83 (95% CI, 0.74–0.94) for colorectal cancer (based on seven studies) (data not shown). Only four studies provided information on recency of OC use and colorectal cancer risk, and the overall RR was 0.70 (95% CI, 0.53–0.90) for short time since last use and 0.87 (95% CI, 0.77–0.99) for long time since last use (Table III). The RRs were 0.51 (95% CI, 0.35–0.74)

for <10 years since last use and 0.77 (95% CI, 0.60–0.99) for ≥10 years since last use (based on three studies) (data not shown).

## Discussion

The present meta-analysis confirms that ever OC users have an approximate 20% reduction in colorectal cancer risk as compared with never OC users (Fernandez *et al.*, 2001; IARC, 2007). The risk reduction is similar for colon and rectal cancer, and is consistently reported in case-control and cohort studies. However, longer duration of OC use is not associated with a greater reduction in risk, but there is a suggestion that the protection is stronger for more recent use.

Observational studies considered in this meta-analysis are prone to various sources of bias. However, differential underreporting of OC use by cases is unlikely in case-control studies, since the potential association between OC and colorectal cancer risk was unknown in most study populations and the results were similar in case-control and cohort studies. With reference to confounding, apart from a few earlier studies, most investigations provided multivariate



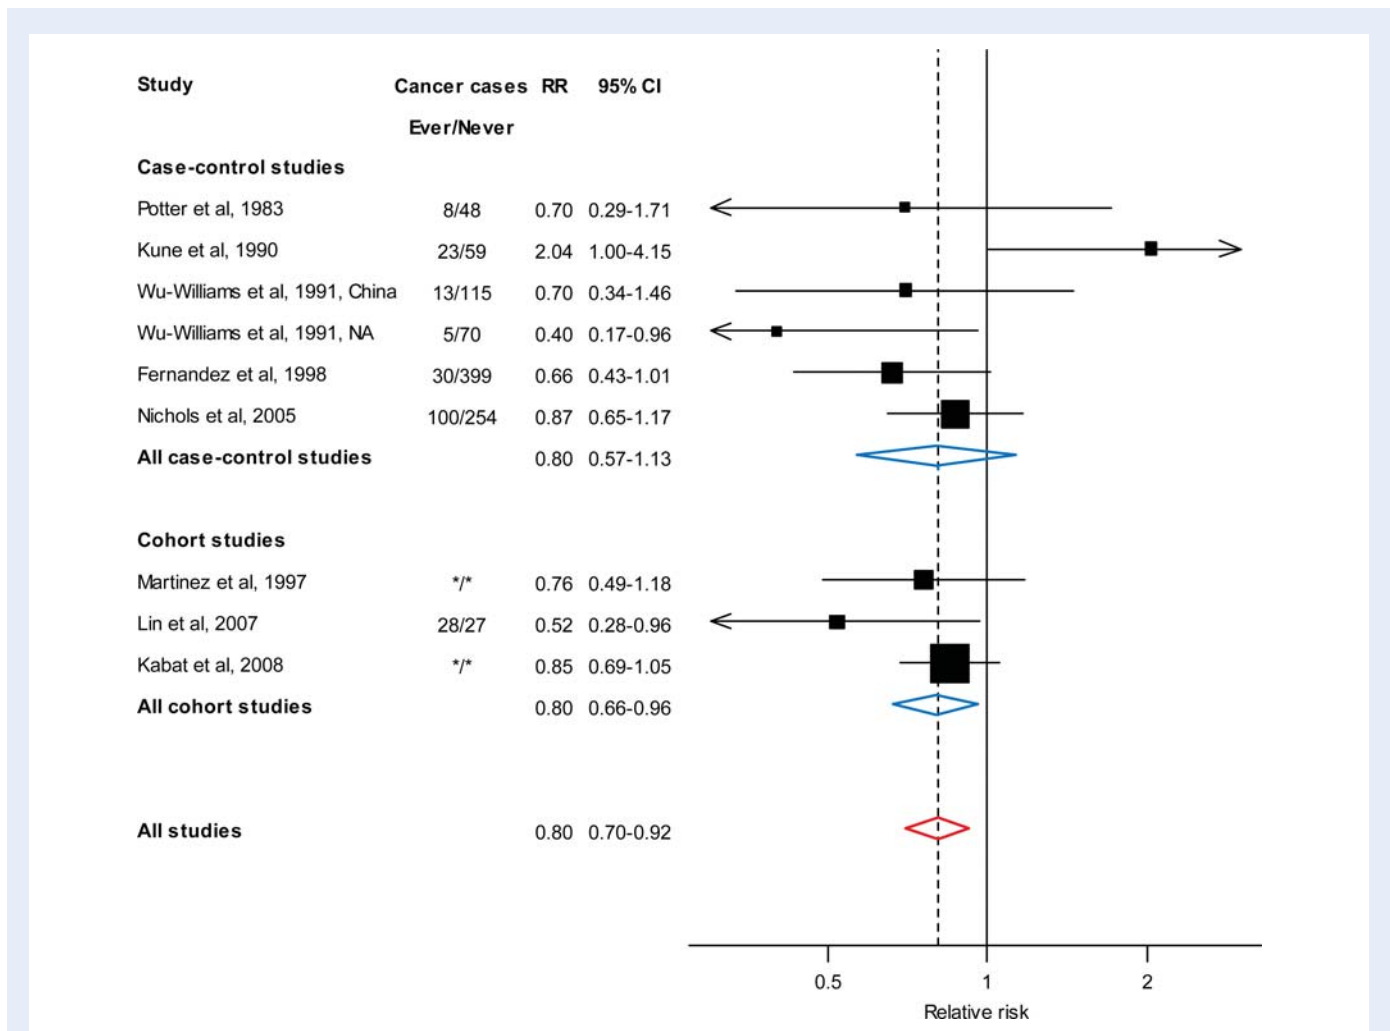

**Figure 3** Summary RRs of rectal cancer for ever versus never use of OCs from case-control and cohort studies.

\*Data not given. CI: confidence interval. NA: north America.

estimates, including allowance for socioeconomic factors, reproductive variables as well as other potential confounding factors for colorectal cancer. Exclusion from the analyses of a few studies which provided only crude estimates or estimates adjusted for a few covariates did not meaningfully modify the pooled estimates, thus ruling out a major effect of confounding factors. Scanty information was available on type of OC. No consistent pattern of trends was, however, observed across calendar year of use, which in most countries is a valid proxy of type of preparation, since first-generation OCs (used in the 1960s) were characterized by high estrogen levels, and subsequent generation OC (used since the early 1970s) had decreased levels of estrogens and progestins (IARC, 2007).

Publication bias is also possible, with selective reporting of favorable findings. Although we did not search for unpublished data, there was no evidence of significant asymmetry in the funnel plots, thus supporting the validity of our results (Egger et al., 1997; Thornton and Lee, 2000).

Various biological mechanisms for the protective effect of OCs on colorectal cancer have been suggested (Newcomb et al., 2008). Female hormones may reduce the synthesis and secretion of bile

acids, which are considered carcinogenic on the colonic epithelium (McMichael and Potter, 1980, 1985). Estrogens inhibit colon carcinogenesis in animal models, and estrogen receptors  $\alpha$  and  $\beta$  have been identified in normal and neoplastic colon epithelial cells (Campbell-Thompson et al., 2001; Di Leo et al., 2001). Estrogens may also reduce circulating levels of insulin-like growth factor-I (IGF-I) and IGF binding protein-3, in turn linked to an increased risk of colorectal cancer (Giovannucci, 2001). Moreover, estrogen-plus-progestin use has been related to a decrease in microsatellite instability (Newcomb et al., 2007). A regression of colorectal adenoma has also been shown in a case of familial adenomatous polyposis after the administration of OCs (Giardiello et al., 2005). The protective role of OC on colorectal cancer is also consistent with the evidence of a protective role of hormonal replacement therapy (Chlebowski et al., 2004; La Vecchia et al., 2005; IARC, 2007). Moreover, the data from this meta-analysis are consistent with recent trends in colorectal cancer mortality in Europe (Bosetti et al., 2008), North America (Jemal et al., 2008) and Japan (Qiu et al., 2009) showing larger decreases in rates in women than in men (particularly in middle-age), and within Europe more favorable patterns in countries

**Table III** Summary RRs and corresponding 95% CIs for colorectal cancer according to duration of use and time since last use

|                            | RR                | 95% CI    | No. of studies included | Studies included                                                                                                                                                                                                                                                         |
|----------------------------|-------------------|-----------|-------------------------|--------------------------------------------------------------------------------------------------------------------------------------------------------------------------------------------------------------------------------------------------------------------------|
| <i>Duration of use</i>     |                   |           |                         |                                                                                                                                                                                                                                                                          |
| Colorectal cancer          |                   |           |                         |                                                                                                                                                                                                                                                                          |
| Short-term use             | 0.88 <sup>a</sup> | 0.77–1.01 | 12                      | Campbell et al. (2007); Fernandez et al. (1998); Hannaford et al. (2007); Kabat et al. (2008); Kune et al. (1990); Levi et al. (2003); Lin et al. (2007); Martinez et al. (1997); Nichols et al. (2005); Troisi et al. (1997); Vessey et al. (2003); Weiss et al. (1981) |
| Long-term use              | 0.86 <sup>a</sup> | 0.74–1.00 |                         |                                                                                                                                                                                                                                                                          |
| Colon cancer               |                   |           |                         |                                                                                                                                                                                                                                                                          |
| Short-term use             | 0.90              | 0.81–1.00 | 10                      | Chute et al. (1991); Fernandez et al. (1998); Jacobs et al. (1994); Kabat et al. (2008); Kune et al. (1990); Lin et al. (2007); Nichols et al. (2005); Peters et al. (1990); Potter and McMichael (1983); Rosenblatt et al. (2004)                                       |
| Long-term use              | 0.87 <sup>a</sup> | 0.72–1.06 |                         |                                                                                                                                                                                                                                                                          |
| Rectal cancer              |                   |           |                         |                                                                                                                                                                                                                                                                          |
| Short-term use             | 0.94 <sup>a</sup> | 0.63–1.41 | 6                       | Chute et al. (1991); Fernandez et al. (1998); Kabat et al. (2008); Kune et al. (1990); Lin et al. (2007); Nichols et al. (2005)                                                                                                                                          |
| Long-term use              | 0.99 <sup>a</sup> | 0.69–1.41 |                         |                                                                                                                                                                                                                                                                          |
| <i>Time since last use</i> |                   |           |                         |                                                                                                                                                                                                                                                                          |
| Colorectal cancer          |                   |           |                         |                                                                                                                                                                                                                                                                          |
| Shorter time               | 0.70              | 0.53–0.90 | 4                       | Fernandez et al. (1998); Hannaford et al. (2007); Levi et al. (2003); Nichols et al. (2005)                                                                                                                                                                              |
| Longer time                | 0.87              | 0.77–0.99 |                         |                                                                                                                                                                                                                                                                          |

<sup>a</sup>P-value for heterogeneity <0.05.

(such as the UK and other northern European countries) where OC had been used earlier and most widely (Levi et al., 2004).

The available epidemiological data thus consistently indicate that OC users have a reduced risk of colorectal cancer, and that the protection is greater for recent use in the absence, however, of a duration–risk relation. A better understanding of any potential relation between OC use and colorectal cancer may therefore help informed choice of contraception (IARC, 2007).

## Authors' Role

C.B. supervised the work and wrote the manuscript; F.B. performed the analysis; E.N. revised the draft manuscript; C.L.V. had the original idea of the study and revised the draft manuscript.

## Acknowledgements

The authors thank Mr Martin Plummer from International Agency for Research on Cancer (IARC) for providing the R function to plot the graphs and Mrs I. Garimoldi for editorial assistance.

## Funding

This work was conducted with the contribution of the Italian Association for Cancer Research, and the Italian League Against Cancer.

## References

Bosetti C, Bertuccio P, Levi F, Lucchini F, Negri E, La Vecchia C. Cancer mortality in the European Union, 1970–2003, with a joinpoint analysis. *Ann Oncol* 2008;**19**:631–640.

Bostick RM, Potter JD, Kushi LH, Sellers TA, Steinmetz KA, McKenzie DR, Gapstur SM, Folsom AR. Sugar, meat, and fat intake, and non-dietary risk factors for colon cancer incidence in Iowa women (United States). *Cancer Causes Control* 1994;**5**:38–52.

Campbell-Thompson M, Lynch IJ, Bhardwaj B. Expression of estrogen receptor (ER) subtypes and ERbeta isoforms in colon cancer. *Cancer Res* 2001;**61**:632–640.

Campbell PT, Newcomb P, Gallinger S, Cotterchio M, McLaughlin JR. Exogenous hormones and colorectal cancer risk in Canada: associations stratified by clinically defined familial risk of cancer. *Cancer Causes Control* 2007;**18**:723–733.

Chlebowski RT, Wactawski-Wende J, Ritenbaugh C, Hubbell FA, Ascensao J, Rodabough RJ, Rosenberg CA, Taylor VM, Harris R, Chen C et al. Estrogen plus progestin and colorectal cancer in postmenopausal women. *N Engl J Med* 2004;**350**:991–1004.

Chute CG, Willett WC, Colditz GA, Stampfer MJ, Rosner B, Speizer FE. A prospective study of reproductive history and exogenous estrogens on the risk of colorectal cancer in women. *Epidemiology* 1991;**2**:201–207.

DerSimonian R, Laird N. Meta-analysis in clinical trials. *Control Clin Trials* 1986;**7**:177–188.

Di Leo A, Messa C, Cavallini A, Linsalata M. Estrogens and colorectal cancer. *Curr Drug Targets Immune Endocr Metabol Disord* 2001;**1**:1–12.

Egger M, Davey Smith G, Schneider M, Minder C. Bias in meta-analysis detected by a simple, graphical test. *BMJ* 1997;**315**:629–634.

Fernandez E, La Vecchia C, D'Avanzo B, Franceschi S, Negri E, Parazzini F. Oral contraceptives, hormone replacement therapy and the risk of colorectal cancer. *Br J Cancer* 1996;**73**:1431–1435.

Fernandez E, La Vecchia C, Franceschi S, Braga C, Talamini R, Negri E, Parazzini F. Oral contraceptive use and risk of colorectal cancer. *Epidemiology* 1998;**9**:295–300.



- Fernandez E, La Vecchia C, Balducci A, Chatenoud L, Franceschi S, Negri E. Oral contraceptives and colorectal cancer risk: a meta-analysis. *Br J Cancer* 2001;**84**:722–727.
- Franceschi S, Bidoli E, Talamini R, Barra S, La Vecchia C. Colorectal cancer in northeast Italy: reproductive, menstrual and female hormone-related factors. *Eur J Cancer* 1991;**27**:604–608.
- Fraumeni JF Jr, Lloyd JW, Smith EM, Wagoner JK. Cancer mortality among nuns: role of marital status in etiology of neoplastic disease in women. *J Natl Cancer Inst* 1969;**42**:455–468.
- Furner SE, Davis FG, Nelson RL, Haenszel W. A case-control study of large bowel cancer and hormone exposure in women. *Cancer Res* 1989;**49**:4936–4940.
- Giardiello FM, Hylind LM, Trimbath JD, Hamilton SR, Romans KE, Cruz-Correa M, Corretti MC, Offerhaus GJ, Yang VW. Oral contraceptives and polyp regression in familial adenomatous polyposis. *Gastroenterology* 2005;**128**:1077–1080.
- Giovannucci E. Insulin, insulin-like growth factors and colon cancer: a review of the evidence. *J Nutr* 2001;**131**:3109S–3120S.
- Greenland S. Quantitative methods in the review of epidemiologic literature. *Epidemiol Rev* 1987;**9**:1–30.
- Hannaford P, Elliott A. Use of exogenous hormones by women and colorectal cancer: evidence from the Royal College of General Practitioners' Oral Contraception Study. *Contraception* 2005;**71**:95–98.
- Hannaford PC, Selvaraj S, Elliott AM, Angus V, Iversen L, Lee AJ. Cancer risk among users of oral contraceptives: cohort data from the Royal College of General Practitioner's oral contraception study. *BMJ* 2007;**335**:651.
- IARC. IARC Monographs on the Evaluation of Carcinogenic Risks to Humans. Vol. 91. Combined Estrogen-progestogen Contraceptives and Combined Estrogen-progestogen Menopausal Therapy. Lyon: International Agency for Research on Cancer, 2007.
- Jacobs EJ, White E, Weiss NS. Exogenous hormones, reproductive history, and colon cancer (Seattle, Washington, USA). *Cancer Causes Control* 1994;**5**:359–366.
- Jemal A, Thun MJ, Ries LA, Howe HL, Weir HK, Center MM, Ward E, Wu XC, Ehemann C, Anderson R et al. Annual report to the nation on the status of cancer, 1975–2005, featuring trends in lung cancer, tobacco use, and tobacco control. *J Natl Cancer Inst* 2008;**100**:1672–1694.
- Kabat GC, Miller AB, Rohan TE. Oral contraceptive use, hormone replacement therapy, reproductive history and risk of colorectal cancer in women. *Int J Cancer* 2008;**122**:643–646.
- Kampman E, Bijl AJ, Kok C, van't Veer P. Reproductive and hormonal factors in male and female colon cancer. *Eur J Cancer Prev* 1994;**3**:329–336.
- Kampman E, Potter JD, Slattery ML, Caan BJ, Edwards S. Hormone replacement therapy, reproductive history, and colon cancer: a multicenter, case-control study in the United States. *Cancer Causes Control* 1997;**8**:146–158.
- Kune GA, Kune S, Watson LF. Oral contraceptive use does not protect against large bowel cancer. *Contraception* 1990;**41**:19–25.
- La Vecchia C, Franceschi S. Reproductive factors and colorectal cancer. *Cancer Causes Control* 1991;**2**:193–200.
- La Vecchia C, Gallus S, Fernandez E. Hormone replacement therapy and colorectal cancer: an update. *J Br Menopause Soc* 2005;**11**:166–172.
- Levi F, Pasche C, Lucchini F, La Vecchia C. Oral contraceptives and colorectal cancer. *Dig Liver Dis* 2003;**35**:85–87.
- Levi F, Lucchini F, Negri E, Boyle P, La Vecchia C. Cancer mortality in Europe, 1995–1999, and an overview of trends since 1960. *Int J Cancer* 2004;**110**:155–169.
- Lin J, Zhang SM, Cook NR, Manson JE, Buring JE, Lee IM. Oral contraceptives, reproductive factors, and risk of colorectal cancer among women in a prospective cohort study. *Am J Epidemiol* 2007;**165**:794–801.
- Martinez ME, Grodstein F, Giovannucci E, Colditz GA, Speizer FE, Hennekens C, Rosner B, Willett WC, Stampfer MJ. A prospective study of reproductive factors, oral contraceptive use, and risk of colorectal cancer. *Cancer Epidemiol Biomarkers Prev* 1997;**6**:1–5.
- McMichael AJ, Potter JD. Reproduction, endogenous and exogenous sex hormones, and colon cancer: a review and hypothesis. *J Natl Cancer Inst* 1980;**65**:1201–1207.
- McMichael AJ, Potter JD. Host factors in carcinogenesis: certain bile-acid metabolic profiles that selectively increase the risk of proximal colon cancer. *J Natl Cancer Inst* 1985;**75**:185–191.
- Negri E, La Vecchia C, Parazzini F, Savoldelli R, Gentile A, D'Avanzo B, Gramenzi A, Franceschi S. Reproductive and menstrual factors and risk of colorectal cancer. *Cancer Res* 1989;**49**:7158–7161.
- Newcomb PA, Zheng Y, Chia VM, Morimoto LM, Doria-Rose VP, Templeton A, Thibodeau SN, Potter JD. Estrogen plus progestin use, microsatellite instability, and the risk of colorectal cancer in women. *Cancer Res* 2007;**67**:7534–7539.
- Newcomb PA, Pocobelli G, Chia V. Why hormones protect against large bowel cancer: old ideas, new evidence. *Adv Exp Med Biol* 2008;**617**:259–269.
- Nichols HB, Trentham-Dietz A, Hampton JM, Newcomb PA. Oral contraceptive use, reproductive factors, and colorectal cancer risk: findings from Wisconsin. *Cancer Epidemiol Biomarkers Prev* 2005;**14**:1212–1218.
- Peters RK, Pike MC, Chang WW, Mack TM. Reproductive factors and colon cancers. *Br J Cancer* 1990;**61**:741–748.
- Potter JD, McMichael AJ. Large bowel cancer in women in relation to reproductive and hormonal factors: a case-control study. *J Natl Cancer Inst* 1983;**71**:703–709.
- Qiu D, Katanoda K, Marugame T, Sobue T. A Joinpoint regression analysis of long-term trends in cancer mortality in Japan (1958–2004). *Int J Cancer* 2009;**124**:443–448.
- Rosenblatt KA, Gao DL, Ray RM, Nelson ZC, Thomas DB. Contraceptive methods and induced abortions and their association with the risk of colon cancer in Shanghai, China. *Eur J Cancer* 2004;**40**:590–593.
- Talamini R, Franceschi S, Dal Maso L, Negri E, Conti E, Filiberti R, Montella M, Nanni O, La Vecchia C. The influence of reproductive and hormonal factors on the risk of colon and rectal cancer in women. *Eur J Cancer* 1998;**34**:1070–1076.
- Thornton A, Lee P. Publication bias in meta-analysis: its causes and consequences. *J Clin Epidemiol* 2000;**53**:207–216.
- Troisi R, Schairer C, Chow WH, Schatzkin A, Brinton LA, Fraumeni JF Jr. Reproductive factors, oral contraceptive use, and risk of colorectal cancer. *Epidemiology* 1997;**8**:75–79.
- van Wayenburg CA, van der Schouw YT, van Noord PA, Peeters PH. Age at menopause, body mass index, and the risk of colorectal cancer mortality in the Dutch Diagnostisch Onderzoek Mammacarcinoom (DOM) cohort. *Epidemiology* 2000;**11**:304–308.
- Vessey M, Painter R, Yeates D. Mortality in relation to oral contraceptive use and cigarette smoking. *Lancet* 2003;**362**:185–191.
- Weiss NS, Daling JR, Chow WH. Incidence of cancer of the large bowel in women in relation to reproductive and hormonal factors. *J Natl Cancer Inst* 1981;**67**:57–60.
- Wu-Williams AH, Lee M, Whittemore AS, Gallagher RP, Jiao DA, Zheng S, Zhou L, Wang XH, Chen K, Jung D et al. Reproductive factors and colorectal cancer risk among Chinese females. *Cancer Res* 1991;**51**:2307–2311.

Submitted on February 18, 2009; resubmitted on March 31, 2009; accepted on April 6, 2009

## Appendix I

Flowchart of selection of studies for the meta-analysis.

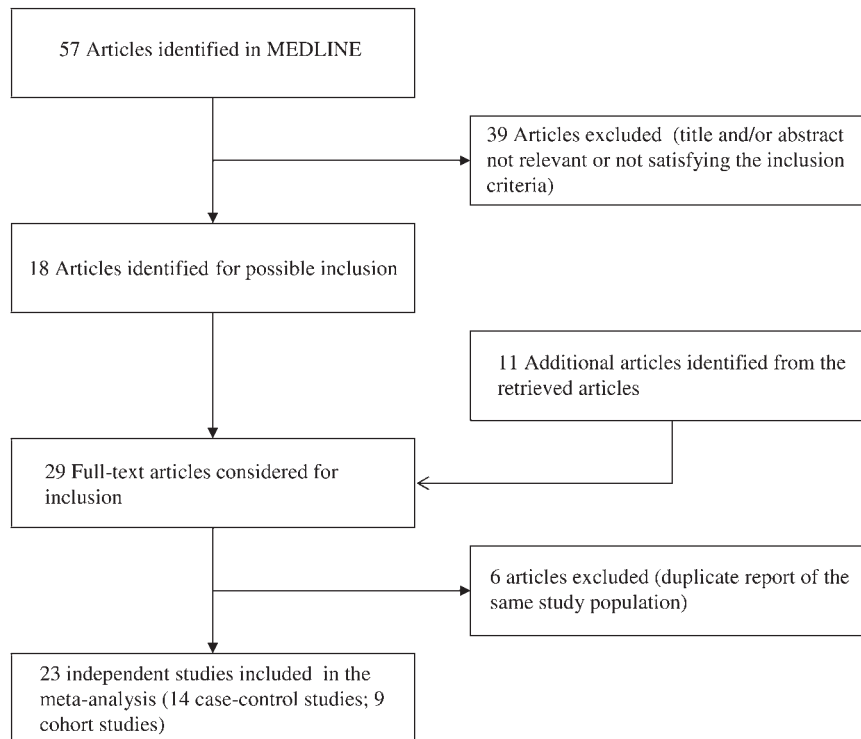

Source: http://academic.oup.com/humupd/article-pdf/15/5/489/17055488/dmp017.pdf
